# Supplementary material for: Correlation of recombination and open circuit voltage in planar heterojunction perovskite solar cells
Source: Royal Society of Chemistry journal article supplement (doi:10.1039/c8tc05837g), 2019-01-01
Supplement: c8tc05837g1.pdf [file c8tc05837g1.pdf]

## Supporting Information

### **Correlation of recombination and open circuit voltage in planar heterojunction perovskite solar cells**

*Daniel Prochowicz, \* Mohammad Mahdi Tavakoli, Ankur Solanki, Teck Wee Goh, Tze Chien Sum and Pankaj Yadav\**

Dr. D. Prochowicz

Institute of Physical Chemistry, Polish Academy of Sciences, Kasprzaka 44/52, 01-224 Warsaw, Poland

Dr. M. M. Tavakoli

Department of Electrical Engineering and Computer Science, Massachusetts Institute of Technology, Cambridge, MA 02139, USA

Department of Materials Science and Engineering, Sharif University of Technology, 14588 Tehran, Iran

A. Solanki, T. W. Goh, Prof. T. C. Sum

Division of Physics and Applied Physics, School of Physical and Mathematical Sciences, Nanyang Technological University, 21 Nanyang Link, Singapore 637371, Singapore

P. Yadav

Department of Solar Energy, School of Technology, Pandit Deendayal Petroleum University, Gandhinagar-382 007, Gujarat, India

E-mails: [Pankaj.yadav@sse.pdpu.ac.in](mailto:Pankaj.yadav@sse.pdpu.ac.in), (P.Y); [dprochowicz@ichf.edu.pl](mailto:dprochowicz@ichf.edu.pl) (D.P.)

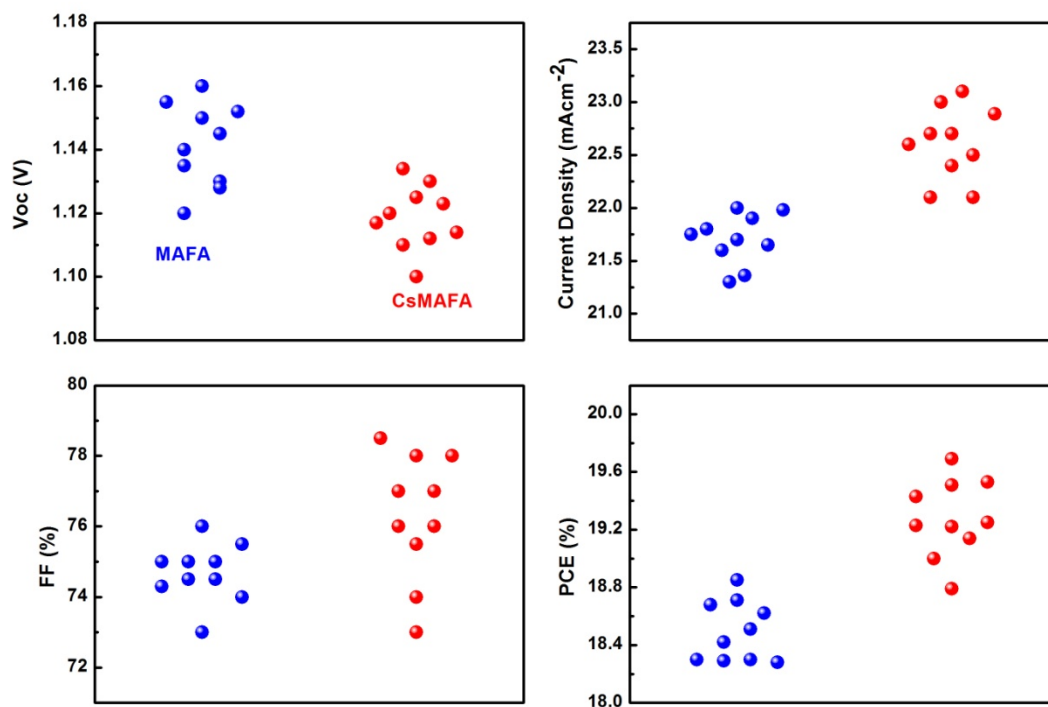

**Figure S1.** The statistical distributions of all collected photovoltaic parameters for the fabricated perovskite solar cells.

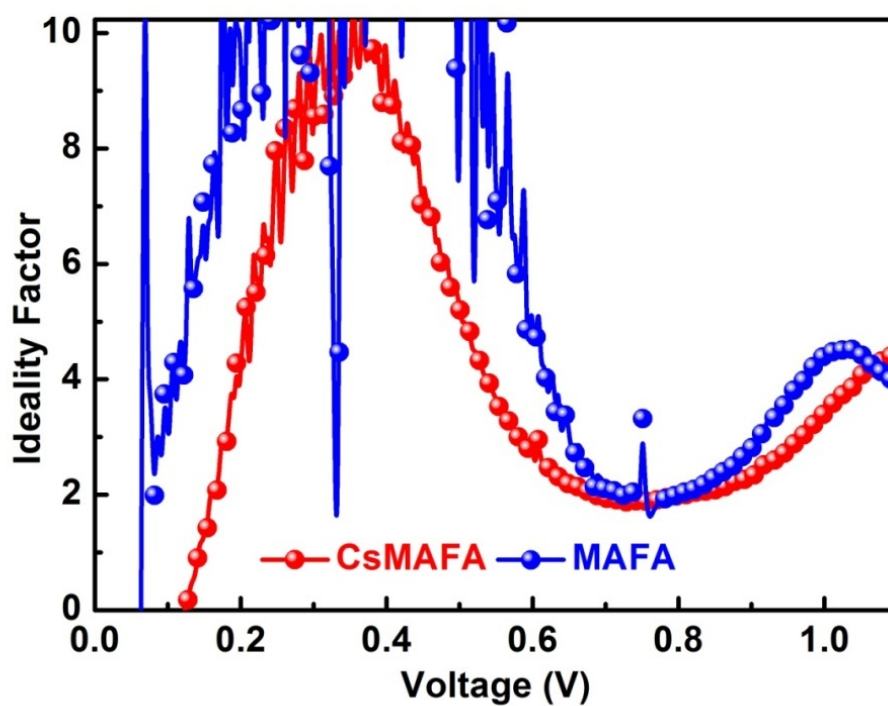

**Figure S2.** The plot of ideality factor versus voltage for the fabricated perovskite solar cells.

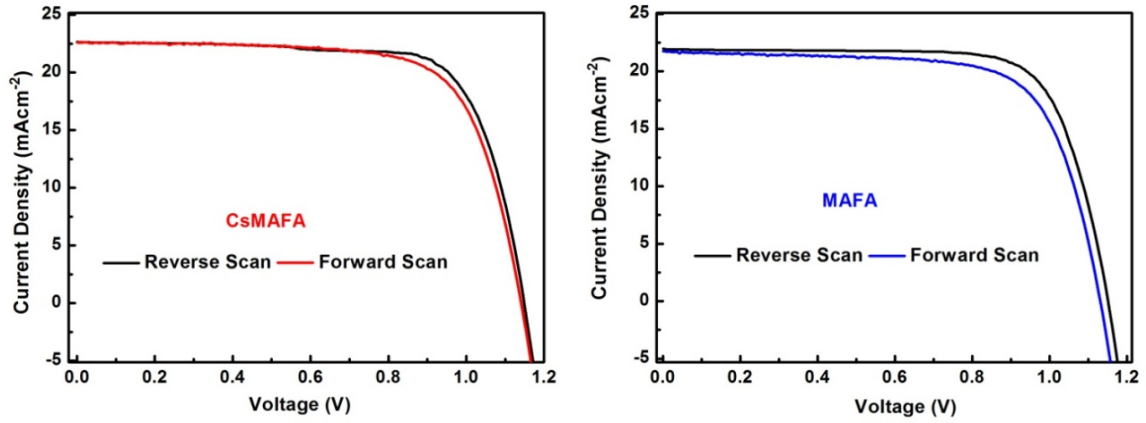

**Figure S3.** The  $J$ - $V$  curves of the fabricated perovskite solar cells measured at 1 Sun illumination under forward and reverse scan directions.

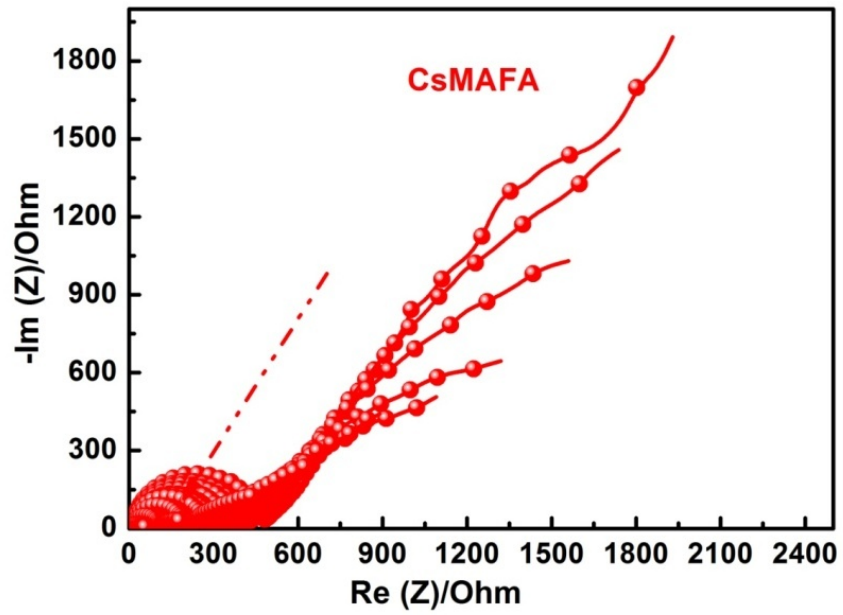

**Figure S4.** The IS spectra of CsMAFA PSCs measured under 1 Sun illumination as a function of applied bias.

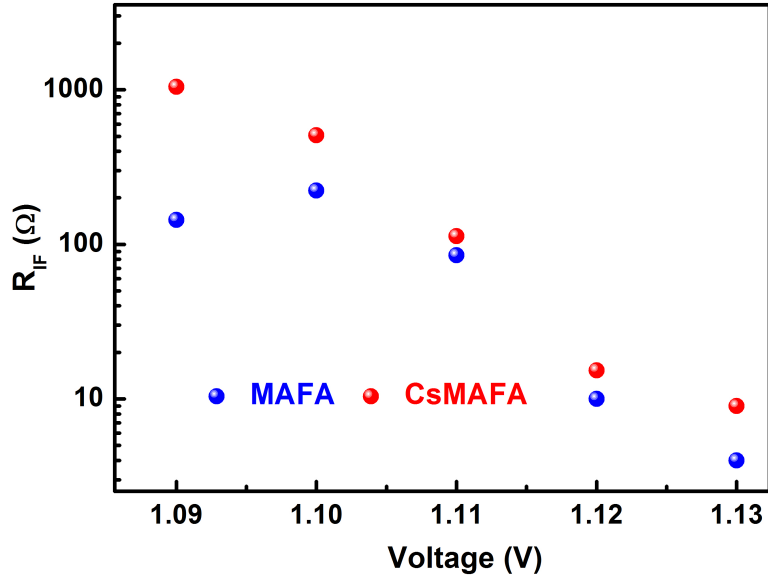

**Figure S5.** The extracted values of  $R_{if}$  for both the devices as a function of applied bias and measured at 1 Sun illumination.

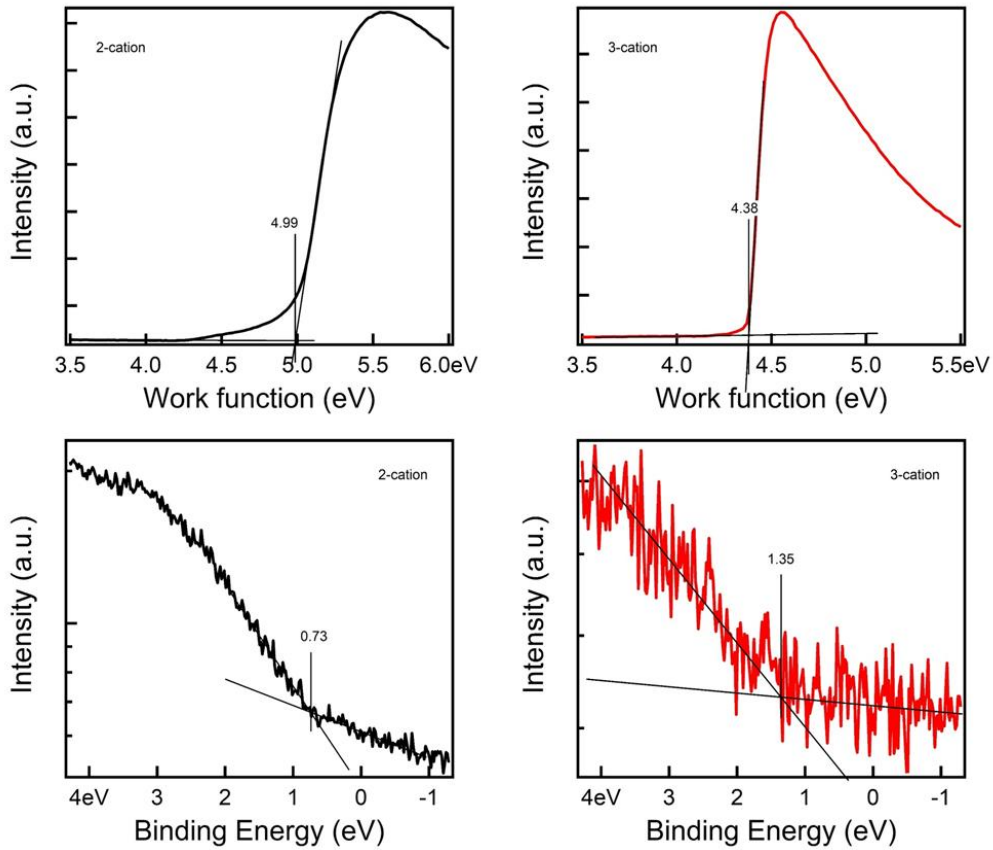

**Figure S6.** UPS measurement of both the MAFA and CsMAFA layers. Work function (a), (b) and valence band maximum (c), (d) measurements (lower) for double cation perovskite (left) and triple cation perovskites (right), respectively.

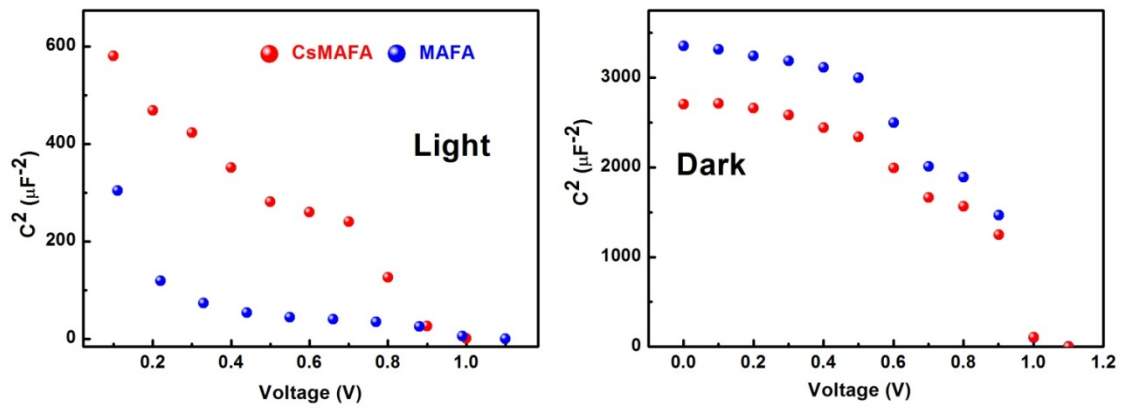

**Figure S7.** Mott-Schotky measurements of both the devices under illumination and dark conditions.
